# Supplementary material
Source: PubMed Central journal article supplement (PMC5127592)
Supplement: NIHMS811287-supplement-Supplemental_Table_4.pdf [file NIHMS811287-supplement-Supplemental_Table_4.pdf]

Supplemental Table 4: Evidence table of reference methodologies (alphabetical; yo = years old)

| <b>Author, publication year, study location</b>               | <b>Title</b>                                                              | <b>Study design</b>                   | <b>Sample size (age)</b>                                                                                                                                    | <b>Statistical method (not including descriptive statistics)</b>                                 | <b>Preference-related outcome(s)</b>                                         |
|---------------------------------------------------------------|---------------------------------------------------------------------------|---------------------------------------|-------------------------------------------------------------------------------------------------------------------------------------------------------------|--------------------------------------------------------------------------------------------------|------------------------------------------------------------------------------|
| Aliani et al., 2012[51]<br>Manitoba, Canada                   | Effect of flax addition on the flavor profile and acceptability of bagels | Within subjects design                | N=9 (22-45 yo)<br>N=89 (18-65 yo)                                                                                                                           | ANOVA, Tukey's test                                                                              | Hedonic rating (flavor acceptability) using a point scale                    |
| Beauchamp and Cowart, 1990[37]<br>Pennsylvania, United States | Preference for high salt concentrations among children                    | Within and between subjects design    | Study 1 (A and B): N=28 (37-89 months)<br>Study 2: N=18 (46-68 months)<br>N=12 (81-125 months)<br>N=28 (36-71 months)<br>N=18 (20-39 yo)<br>N=12 (25-37 yo) | Comparison of proportions (Study 1)<br>Fisher's exact test (Study 2)                             | Study 1 = paired comparison<br>Study 2 = Questionnaire and paired comparison |
| Beauchamp et al., 1986[56]<br>Pennsylvania, United States     | Developmental changes in salt acceptability in human infants              | Within subjects design                | N=54 (2.4-6.7 months) study one<br>N=16 (7-23 months) study 2<br>N=18 (31-60 months) study 2                                                                | No statistical analyses other than descriptive statistics                                        | Sweet and salty taste acceptability via amount consumed                      |
| Beauchamp and Moran, 1982[16]<br>Pennsylvania, United States  | Appetite: Dietary experience and sweet taste preference in human infants. | Longitudinal repeated measures design | N=199 (at birth infants)<br>N=140 (same infants at 6 months)                                                                                                | Pearson's correlation, Intraclass correlation, ANOVA and ANCOVA, Newman Keuls post-hoc analyses, | Sweet solution preference via amount consumed                                |
| Beauchamp and Moran, 1984[17]<br>Pennsylvania, United States  | Acceptance of sweet and salty tastes in 2-year-old children               | Longitudinal repeated measures design | N=63 (at birth infants, again 6 months, again at 2 yo)                                                                                                      | ANOVA, post hoc tests, t-tests                                                                   | Sweet and salty solution/food preferences via amount consumed                |
| Capaldi et al., 2008[42]<br>Florida, United States            | Decreasing dislike for sour and bitter in children and adults             | Within subjects design                | N=63 (2-5 yo)<br>N=32 (18-23 yo)                                                                                                                            | ANOVA, pairwise analysis                                                                         | Liking ratings for sucrose solutions via pictures (children) or              |

|                                                        |                                                                                                                                    |                        |                                                        |                                                         |                                                                                               |
|--------------------------------------------------------|------------------------------------------------------------------------------------------------------------------------------------|------------------------|--------------------------------------------------------|---------------------------------------------------------|-----------------------------------------------------------------------------------------------|
|                                                        |                                                                                                                                    |                        |                                                        |                                                         | point scales (adults)                                                                         |
| Chauhan and Hawrysh, 1988[43]<br>Edmonton, Canada      | Suprethreshold sour taste intensity and pleasantness perception with age                                                           | Within subjects design | N= 60 (20-29 yo)<br>N=60 (70-79 yo)<br>N=60 (80-99 yo) | ANOVA, Student-Newman-Keuls multiple-range tests        | Taste and intensity numerical ratings relative to a reference                                 |
| Coldwell et al., 2009[54]<br>Washington, United States | A marker of growth differences between adolescents with high versus low sugar preference                                           | Within subjects design | N=143 (11-15 yo)                                       | Rank order and Mann-Whitney U, MANOVA, ANCOVA           | Ratings of liking and intensity via visual analog scales                                      |
| Conner and Booth, 1988[55]<br>United Kingdom           | Preferred sweetness of a lime drink and preference for sweet over non-sweet foods, related to sex and reported age and body weight | Within subjects design | N=344 (6-85 yo)                                        | Least squares regression, Principal Components Analysis | Preference rating of lime drink + varying amounts of sugar using point scales                 |
| Cooke and Wardle, 2005[15]<br>London, United Kingdom   | Age and gender differences in children's food preferences                                                                          | Cross-sectional survey | N=1291 (4-16 yo)                                       | t-tests, ANOVA                                          | Food item preference questionnaire responses                                                  |
| Copeland et al., 2007[28]<br>Australia                 | Young Australians and alcohol: The acceptability of ready-to-drink (RTD) alcoholic beverages among 12-30-year-olds                 | Within subjects design | N=350 (12-30 yo)                                       | ANOVA                                                   | Acceptability and liking of experimental alcoholic and nonalcoholic drinks using point scales |
| De Graaf et al., 1994[34]<br>The Netherlands           | Sensory perception and pleasantness in elderly subjects                                                                            | Within subjects design | N=32 (20-25 yo)<br>N=23 (72-82 yo)                     | ANOVA                                                   | Rate intensity and the pleasantness of five series of food flavors with multiple              |

|                                                              |                                                                                                                                       |                                                  |                                                               |                                                             |                                                                                               |
|--------------------------------------------------------------|---------------------------------------------------------------------------------------------------------------------------------------|--------------------------------------------------|---------------------------------------------------------------|-------------------------------------------------------------|-----------------------------------------------------------------------------------------------|
|                                                              |                                                                                                                                       |                                                  |                                                               |                                                             | concentrations                                                                                |
| De Graaf and Zandstra, 1999[18]<br>The Netherlands           | Sweetness intensity and pleasantness in children, adolescents, and adults                                                             | Within subjects design                           | N=30 (8–10 yo)<br>N=30 (14–16 yo)<br>N=30 (20–25 yo)          | ANOVA, Pearson correlation coefficient, Kruskal-Wallis test | Rate sweetness and pleasantness using point scales and rank ordering                          |
| Deglaire et al., 2015[30]<br>France                          | Associations between weight status and liking scores for sweet, salt and fat according to gender in adults (the Nutrinet-Sante study) | Web-based prospective observational cohort study | N= 46 909 (18+ yo)                                            | ANOVA , Linear regression analysis of covariance            | Sweet and fat liking of foods using point scales                                              |
| Desor et al., 1975[39]<br>Pennsylvania, United States        | Preferences for sweet and salty in 9- to 15-year old and adult humans                                                                 | Within subjects design                           | N= 618 (9-15 yo)<br>N=140 (adults)                            | Chi square                                                  | Preference tests (ranking) from four concentrations each of sucrose, lactose, sodium chloride |
| Desor and Beauchamp, 1987[23]<br>Pennsylvania, United States | Longitudinal changes in sweet preferences in humans                                                                                   | Longitudinal study                               | N=44 (tested first at 11-15 yo and tested second at 19-25 yo) | Chi square                                                  | Preference tests (ranking) from four concentrations each of sucrose                           |
| Drewnowski et al., 2001[44]<br>Washington, United States     | Genetic taste responses to 6-n-propylthiouracil among adults: A screening tool for epidemiological studies                            | Within subjects design                           | N=742 (18-70 yo)                                              | Chi square, regression analyses                             | Rate taste intensity and hedonic preferences for bitter and sweet using point scale           |
| Engen, 1974[12]<br>Rhode Island, United States               | The potential usefulness of sensations of odor and taste in keeping children away from harmful substances                             | Within subjects design                           | N=16 (4 yo)<br>N=17 (7 yo)<br>N=35 (adult)                    | Pairwise comparison of proportions                          | Odorant or taste pairs with forced choice of “liked best” or “liked least”                    |
| Enns et al., 1979[36]<br>New York,                           | Contributions of age, sex and degree of                                                                                               | Within subjects design                           | N=21 (5 <sup>th</sup> grade students)<br>N=27 (college        | Chi square, linear regression                               | Rate preference of sucrose solutions by                                                       |

|                                                                                             |                                                                                                                             |                        |                                                                         |                                                                                       |                                                                                                                                |
|---------------------------------------------------------------------------------------------|-----------------------------------------------------------------------------------------------------------------------------|------------------------|-------------------------------------------------------------------------|---------------------------------------------------------------------------------------|--------------------------------------------------------------------------------------------------------------------------------|
| United States                                                                               | fatness on preferences and magnitude estimations for sucrose in humans                                                      |                        | undergraduates)<br>N=12 (“elderly”)                                     |                                                                                       | hedonic rating (point scale) and paired comparison                                                                             |
| Forestell and Mennella Monell, 2005[47]<br>Pennsylvania, United States                      | Children’s hedonic judgments of cigarette smoke odor: Effects of parental smoking and maternal mood                         | Within subjects design | N=237 (3-8 yo)                                                          | Cochran’s Q tests, Pearson’s chi square, Spearman’s ranked correlation, ANOVA         | Rate liking, identification and preference for a variety of odors via age-appropriate games (e.g., “the smell game”).          |
| Knaapila et al., 2012[33]<br>Pennsylvania, United States                                    | Genetic analysis of chemosensory traits in human twins                                                                      | Within subjects design | N=572 (21-82 yo)                                                        | Pearson’s correlation, t-test, Chi-square test correlation                            | Rate taste and smell on sweetness, liking, pleasantness, intensity, saltiness, bitterness, sourness, and/or burn rating scales |
| Knip et al., 1931[50]<br>Illinois, United States                                            | Studies in affective psychology                                                                                             | Within subjects design | N=100 (first experiment 18-24 yo)<br>N=100 (second experiment 18-24 yo) | No statistical analyses; percentages only<br>Comparison of percentage of pleasantness | Rate percent pleasantness of a group of odors (0-100%); Rated individual odors on a pleasantness rating scale                  |
| Laing and Clark, 1983[49]<br>Australia                                                      | Puberty and olfactory preferences of males                                                                                  | Within subjects design | N=82 (8-9 yo)<br>N=118 (14 yo)<br>N=102 (16 yo)                         | ANOVA, rank order                                                                     | Hedonic ratings (like/dislike) of pairs of odors on a continuous scale                                                         |
| Lanfer et al., 2012[13]<br>Italy, Estonia, Cyprus, Belgium, Sweden, Germany, Hungary, Spain | Taste preferences in association with dietary habits and weight status in European children: results from the IDEFICS study | Within subjects design | N=1696 (6-9 yo)                                                         | Chi square, linear regression, logistic regression                                    | Forced preference choice between two tastes for five tastes                                                                    |
| Lanfer et al., 2013[14]                                                                     | Predictors and correlates of                                                                                                | Within subjects        | N=1705 (6-9 yo)                                                         | Chi square, logistic                                                                  | Taste thresholds evaluated.                                                                                                    |

|                                                                  |                                                                                                  |                        |                                                    |                                                                                                                             |                                                                                                                                      |
|------------------------------------------------------------------|--------------------------------------------------------------------------------------------------|------------------------|----------------------------------------------------|-----------------------------------------------------------------------------------------------------------------------------|--------------------------------------------------------------------------------------------------------------------------------------|
| Italy, Estonia, Cyprus, Belgium, Sweden, Germany, Hungary, Spain | taste preferences in European children: The IDEFICS study                                        | design                 |                                                    | regression                                                                                                                  | Preference for various flavors in liquid and solid mediums using paired comparison tests                                             |
| Liem and Mennella, 2003[41]<br>Pennsylvania, United States       | Heightened sour preferences during childhood                                                     | Within subjects design | N=61 (5-9 yo)<br>N= 61 (adult mothers)             | Chi square, Kendall tau correlations, Friedman's test, ANOVA                                                                | Rank preference and intensity ratings for gelatins with different concentrations of sour                                             |
| Liem and de Graaf, 2004[27]<br>The Netherlands                   | Sweet and sour preferences in young children and adults: role of repeated exposure               | Within subjects design | N=59 (6-11)<br>N=46 ("young adult")                | Mann-Whitney U-tests, chi square, Spearman correlation coefficients, Tau correlation coefficient, Wilcoxon Signed Rank test | Rank preference of drinks and yogurt with different sweet and sour levels most preferred to least preferred                          |
| Liem et al., 2004[19]<br>The Netherlands                         | Consistency of sensory testing with 4- and 5-year-old children                                   | Within subjects design | N=21 (4 yo)<br>N=47 (5 yo)<br>N=22 ("young adult") | Pearson correlation coefficients, Friedman analyses of ranks, rank order tests, t-tests                                     | Paired comparison and rank-order tests of pairs for "In which beverage did we put the most sugar?" and "Which one do you like best?" |
| Liem et al., 2010[52]<br>London, United Kingdom                  | Prediction of children's flavor preferences. Effect of age and stability in reported preferences | Within subjects design | N=152 (3-10 yo)                                    | Friedman analyses of ranks, post-hoc tests, Spearman rank order correlation coefficient                                     | Liking categorization of five flavors of ice cream by "bad", "okay", "nice"; ranking from most preferred to least preferred.         |
| Logue and Smith, 1986[32]                                        | Predictors of food preferences in                                                                | Cross-sectional survey | N=303 (14-68 yo)                                   | Pearson product-moment                                                                                                      | Food preferences questionnaire                                                                                                       |

|                                                          |                                                                                                                                          |                        |                                                                        |                                                                       |                                                                                                                                               |
|----------------------------------------------------------|------------------------------------------------------------------------------------------------------------------------------------------|------------------------|------------------------------------------------------------------------|-----------------------------------------------------------------------|-----------------------------------------------------------------------------------------------------------------------------------------------|
| New York, United States                                  | adult humans                                                                                                                             |                        |                                                                        | correlation comparisons,                                              |                                                                                                                                               |
| Mennella et al., 2003[45]<br>Pennsylvania, United States | Modification of bitter taste in children                                                                                                 | Within subjects design | N=34 (7-10 yo)<br>N <34 (mothers of child or children)                 | Binomial distribution tests, Friedman two-way non-parametric analyses | Age-appropriate game-like forced-choice task between pairs of solutions; preference ranking of solutions                                      |
| Mennella et al., 2011[24]<br>Pennsylvania, United States | Evaluation of the Monell forced-choice, paired-comparison tracking procedure for determining sweet taste preferences across the lifespan | Within subjects design | N=356 (5-9.9 yo)<br>N=169 (10-19.9 yo)<br>N=424 (“adult”)              | ANOVA, regression analysis                                            | Forced choice preferences between pairs of solutions with solutions presented multiple times with one identified as preferred over the others |
| Mennella et al., 2012[21]<br>Pennsylvania, United States | The proof is in the pudding: children prefer lower fat but higher sugar than do mothers                                                  | Within subjects design | N=84 (5-10 yo)<br>N=67 (mothers)                                       | ANOVA, chi square                                                     | Forced choice preference pairs; ranking of most to least preferred combinations of sucrose and fat                                            |
| Mennella et al., 2014[20]<br>Pennsylvania, United States | Preferences for salty and sweet tastes are elevated and related to each other during childhood                                           | Within subjects design | N=108 (5-10 yo)<br>N=83 (mothers)                                      | ANOVA, t-tests, Pearson’s correlation                                 | Forced choice preference between pairs                                                                                                        |
| Monneuse et al., 1991[26]<br>Paris, France               | Impact of sex and age on sensory evaluation of sugar and fat in dairy products                                                           | Within subjects design | N=74 (10-13 yo)<br>N=49 (14-15 yo)<br>N=42 (16-19 yo)<br>N=61 (20+ yo) | ANOVA                                                                 | Hedonic, sweetness and fat ratings using point scales                                                                                         |
| Murphy, 1983[53]<br>Pennsylvania, United States          | Age-related effects on the threshold, psychophysical function, and pleasantness of                                                       | Within subjects design | N=10 (18-26 yo)<br>N=10 (>65 yo)                                       | Mann-Whitney U tests, linear regression                               | Up-down method for tracking thresholds of perception                                                                                          |

|                                                             |                                                                                                                      |                                     |                                                                                                                                                                                                        |                                                                                                               |                                                                                                                                                                                                         |
|-------------------------------------------------------------|----------------------------------------------------------------------------------------------------------------------|-------------------------------------|--------------------------------------------------------------------------------------------------------------------------------------------------------------------------------------------------------|---------------------------------------------------------------------------------------------------------------|---------------------------------------------------------------------------------------------------------------------------------------------------------------------------------------------------------|
|                                                             | menthol                                                                                                              |                                     |                                                                                                                                                                                                        |                                                                                                               |                                                                                                                                                                                                         |
| Murphy and Withee, 1986[29]<br>California, United States    | Age-related differences in the pleasantness of chemosensory stimuli                                                  | Within subjects design              | N=100 (18-26 yo)<br>N=100 (32-45 yo)<br>N=100 (65-93)                                                                                                                                                  | ANOVA, Newman-Keuls multiple-range tests                                                                      | Rate pleasantness/unpleasantness of different sweet, salty and sour solutions on a continuous scale                                                                                                     |
| Nu et al., 1996[22]<br>South of France                      | Effects of age and gender on adolescents' food habits and preferences                                                | Survey                              | N=222 (10-20 yo)                                                                                                                                                                                       | Chi-square                                                                                                    | Survey of eating behavior and food preferences                                                                                                                                                          |
| Rinck et al., 2011[48]<br>Villeneuve-le`s-Maguelone, France | Ontogeny of odor liking during childhood and its relation to language development                                    | Longitudinal within subjects design | N=15 (3 yo; retested at 4 and 5 yo)                                                                                                                                                                    | “language production scores”, z-test for comparing means -                                                    | Odors tested with “Do you like or dislike this odor?” and “Can you tell me what it is?”                                                                                                                 |
| Schiffman et al., 2000[31]<br>North Carolina, United States | Elevated and sustained desire for sweet taste in African-Americans: A potential factor in the development of obesity | Within subjects design              | N=11 (African-Americans with mean age of 27.8)<br>N=12 (European Americans with mean age of 25.2)<br>N=11 (African-Americans with mean age of 73.1)<br>N=11 (European Americans with mean age of 74.8) | ANOVA, rank order correlation                                                                                 | Measure calories consumed of various drinks and foods; continuous rating scale for “How strong is your desire for another taste of this sample?” and “How strong is your desire for a different taste?” |
| Schmidt et al., 1988[46]<br>Pennsylvania, United States     | Adults-like odor preferences and aversions in three-year-old children                                                | Within subjects design              | N=16 (3 yo)<br>N=17 (adults)                                                                                                                                                                           | Log-linear analysis, partial Chi square, post-hoc Fisher exact probability tests, Spearman's rank correlation | Forced choice hedonic “reactions” to odors using age appropriate “smell game” (good or bad/yucky); Rank order preference by adults                                                                      |
| Schwartz et al., 2009[11]<br>France                         | Developmental changes in the acceptance of the five basic                                                            | Within subjects design              | N=45 (3 month old infants)<br>N= 45 (6 month old infants)                                                                                                                                              | Student's t-test, chi square, ANOVA                                                                           | Taste acceptability via amount consumed from                                                                                                                                                            |

|                                                            |                                                                                   |                                                  |                                                                                                                                                                                               |                                                                 |                                                                               |
|------------------------------------------------------------|-----------------------------------------------------------------------------------|--------------------------------------------------|-----------------------------------------------------------------------------------------------------------------------------------------------------------------------------------------------|-----------------------------------------------------------------|-------------------------------------------------------------------------------|
|                                                            | tastes in the first year of life                                                  |                                                  | N=45 (12 month old infants)                                                                                                                                                                   |                                                                 | bottles                                                                       |
| Thompson et al., 2007[25]<br>North Carolina, United States | Chocolate milk and the Hispanic customer                                          | Focus groups plus follow up and Consumer testing | (Focal groups)<br>N=31 (Hispanic 18-55 yo)<br>N=31 (Caucasian 18-55 yo)<br>N=29 (Hispanic 10-14 yo)<br>(Consumer testing)<br>N=45 (Hispanic 10-14 yo )<br>N=29 (Hispanic )<br>N=91 (Caucasian | ANOVA, chi square, generalized linear models, mixed model ANOVA | Consumption habits; tasting and discussion of commercial milk products        |
| Verma et al., 2007[38]<br>India                            | Salt preference: Age and sex related variability                                  | Within subjects design                           | N=60 (7-12 yo)<br>N=60 (18-21 yo)                                                                                                                                                             | ANOVA                                                           | Rate preference for popcorns with varying saltiness on a numerical scale      |
| Zallen et al., 1990[40]<br>North Carolina, United States   | Salt taste preferences and perceptions of elderly and young adults                | Within subjects design                           | N=53 (20-35 yo)<br>N=48 (65-78 yo)                                                                                                                                                            | ANOVA                                                           | Rate salt preference for test foods on a numerical scale                      |
| Zandstra et al., 1998[35]<br>The Netherlands               | Sensory perception and pleasantness of orange beverages from childhood to old age | Within subjects design                           | N=31 (6-12 yo)<br>N=30 (13-18 yo)<br>N=30 (19-34 yo)<br>N=30 (35-49 yo)<br>N=29 (50-65 yo)<br>N=30 (65+ yo)                                                                                   | ANOVA, Friedman's chi square                                    | Rate pleasantness, sweetness, sourness, flavor intensity on a numerical scale |
